# Supplementary material
Source: PubMed Central journal article supplement (PMC4143259)
Supplement: NIHMS345968-supplement-Supporting_Info.pdf [file NIHMS345968-supplement-Supporting_Info.pdf]

## Small Molecule End Group of Linear Polymer Determines Cell-type Gene Delivery Efficacy

By Joel Sunshine, Jordan J. Green, Kerry Mahon, Fan Yang, Ahmed A. Eltoukhy, David N. Nguyen, Robert Langer, and Daniel G. Anderson

### Supporting Information

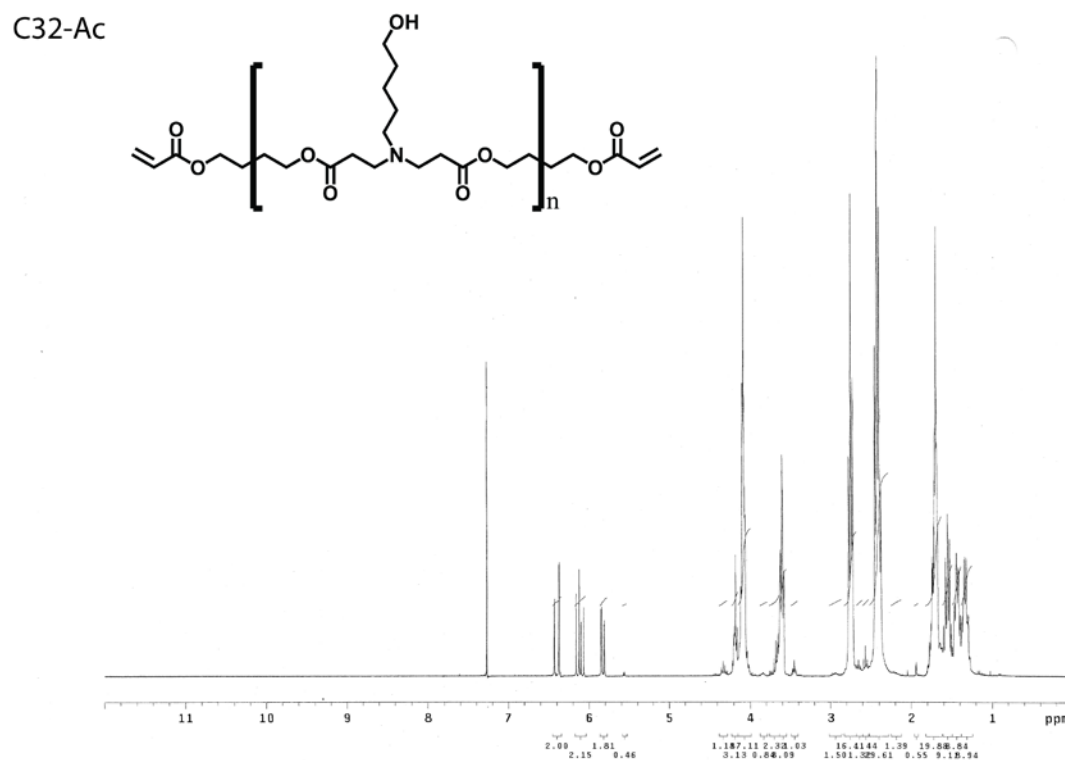

Figure S1a:  $^1\text{H-NMR}$  of acrylate-terminated (1.2:1 acrylate: amine) C32



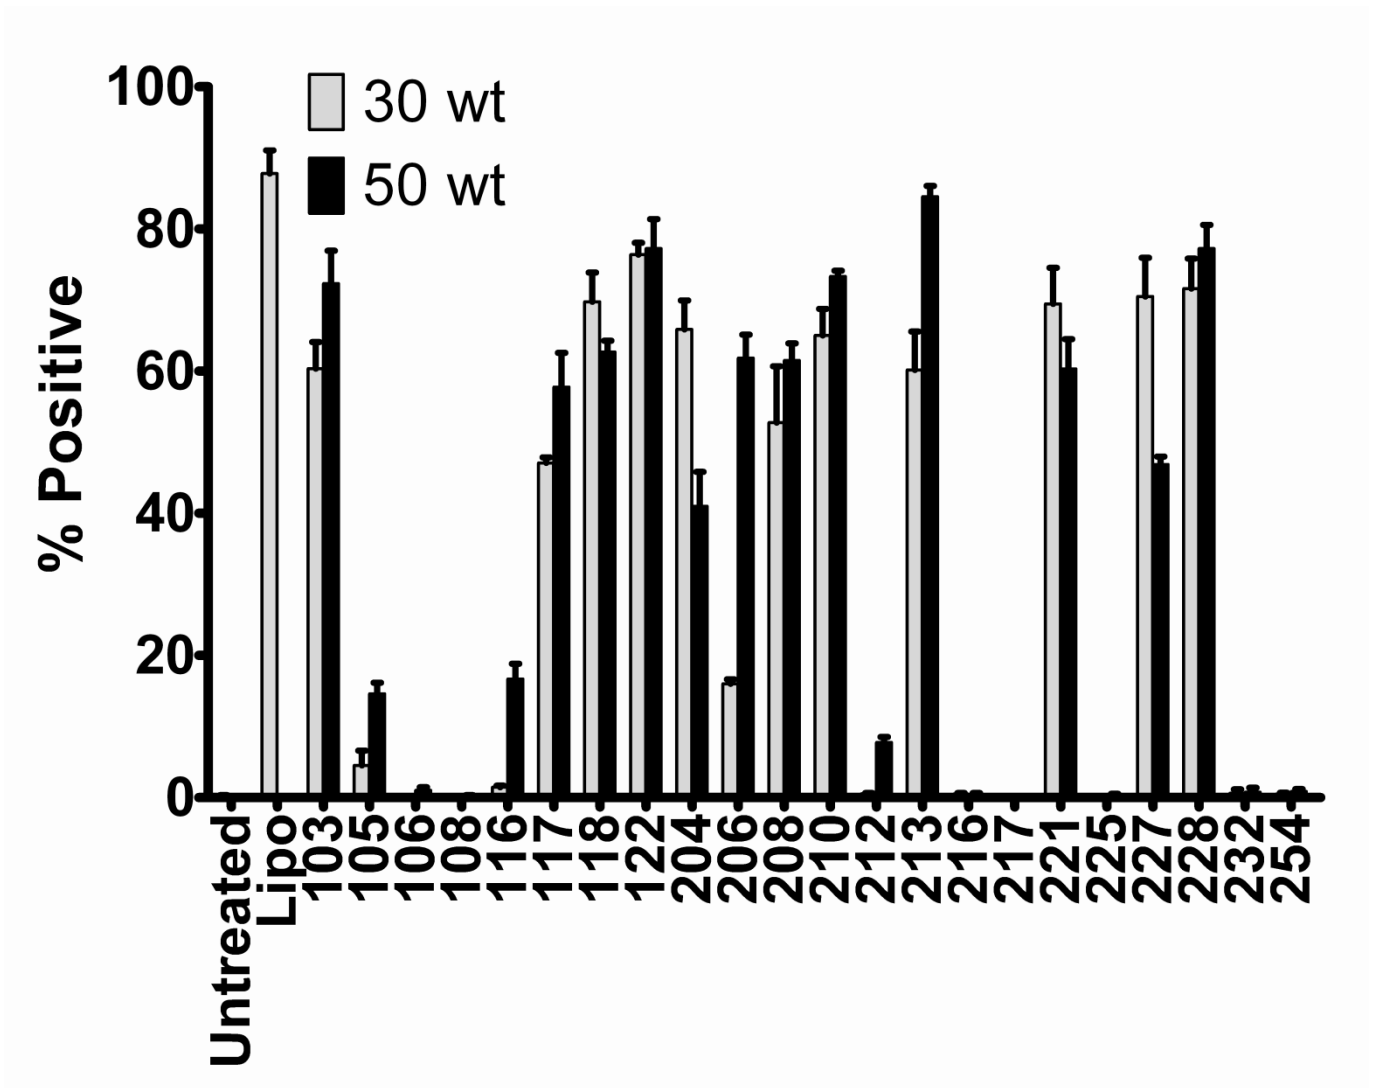

Figure S2: Transfection of HeLa cells using end-modified polymers. Percent positive cells determined by GFP expression and FACS. Mean + SD shown. Polymers are used at 30 w/w and 50 w/w and Lipofectamine 2000 is used following manufacturer instructions.

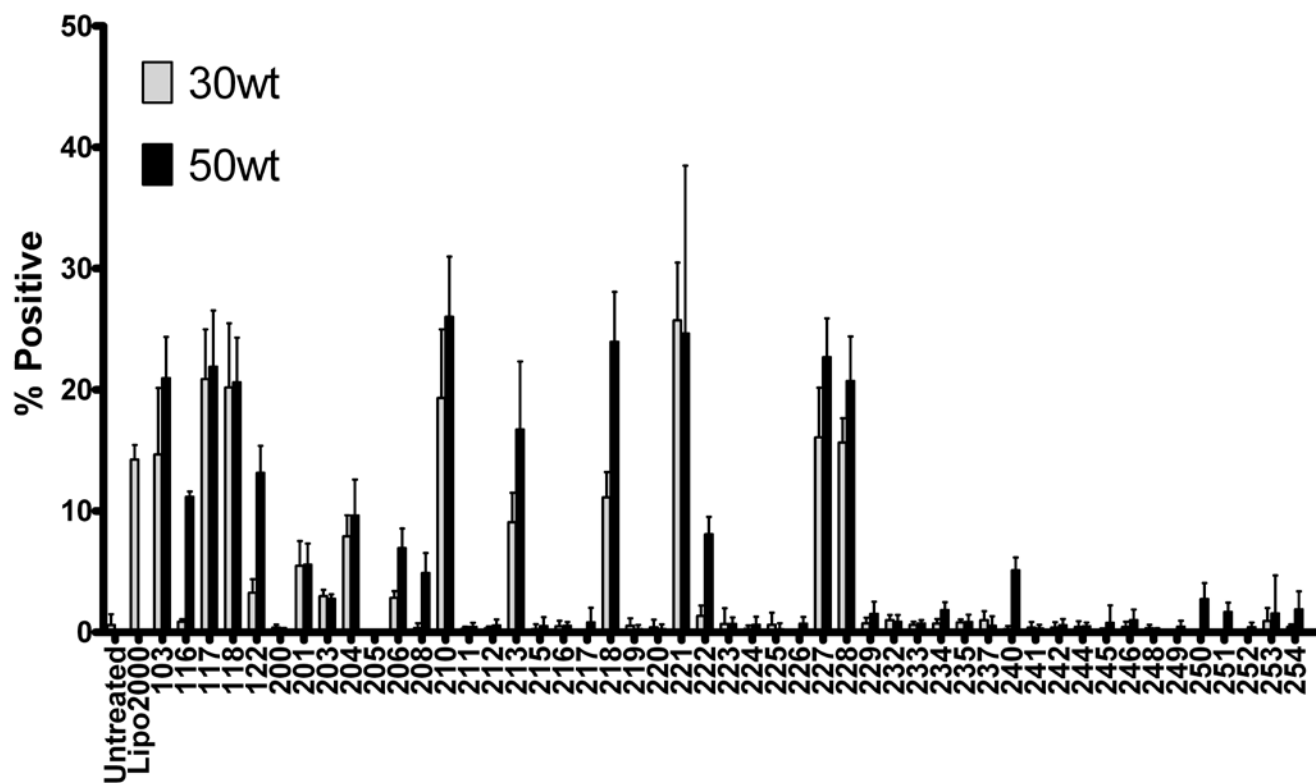

Figure S3: Transfection of HEPG2 cells using end-modified polymers. Percent positive cells determined by GFP expression and FACS. Mean + SD shown. Polymers are used at 30 w/w and 50 w/w and Lipofectamine 2000 is used following manufacturer instructions.

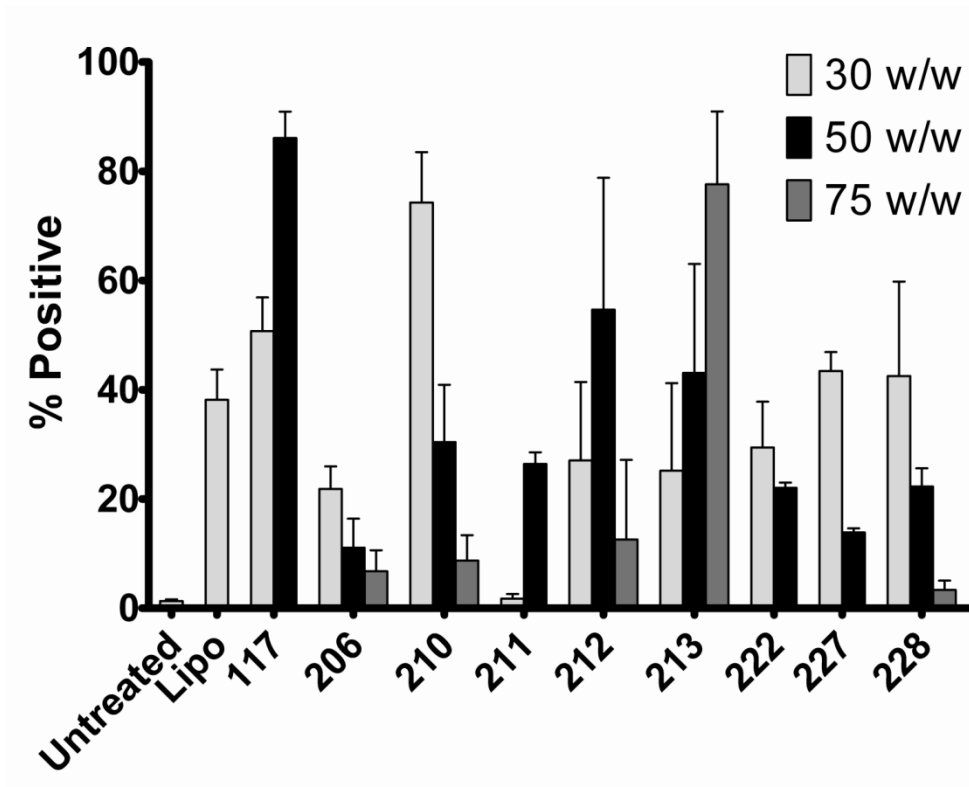

Figure S4: Transfection of HUVECs using end-modified polymers. Percent positive cells determined by GFP expression and FACS. Mean + SD shown. Polymers are used at 30 w/w, 50 w/w, and 75 w/w and Lipofectamine 2000 is used following manufacturer instructions.

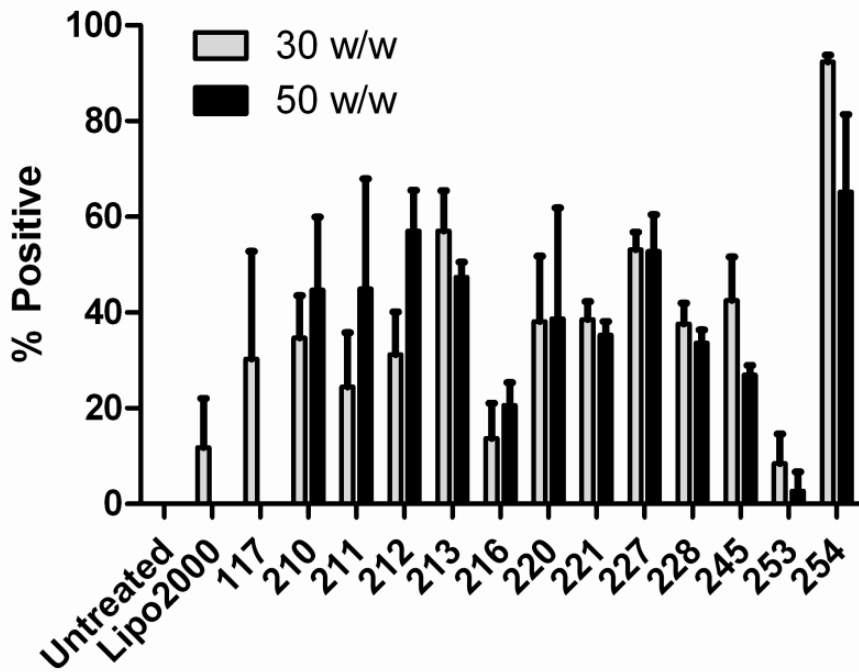

Figure S5: Transfection of DC2.4s using end-modified polymers. Percent positive cells determined by GFP expression and FACS. Mean + SD shown. Polymers are used at 30 w/w and 50 w/w and Lipofectamine 2000 is used following manufacturer instructions.

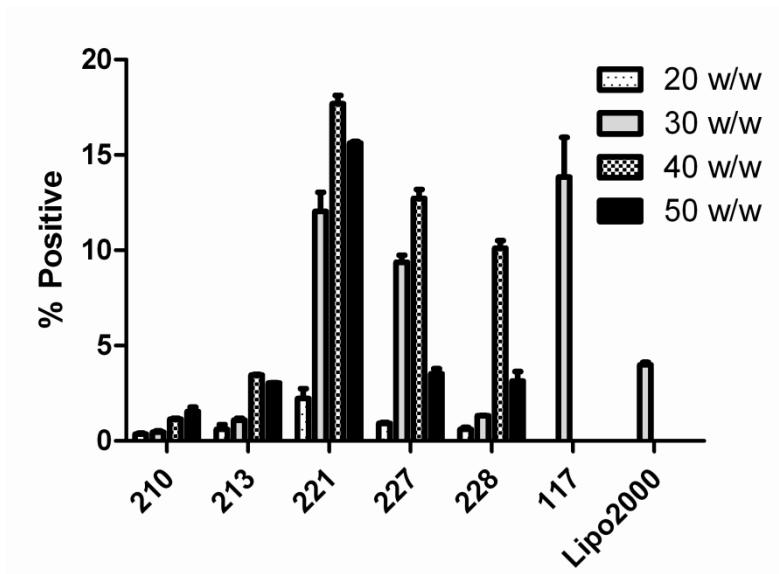

Figure S6a: Transfection of Human Mesenchymal Stem Cells using end-modified polymers at regular DNA dose. Percent positive cells determined by GFP expression and FACS. Mean + SD shown. Polymers are used at 20, 30, 40 and 50 w/w and Lipofectamine 2000 is used following manufacturer instructions.

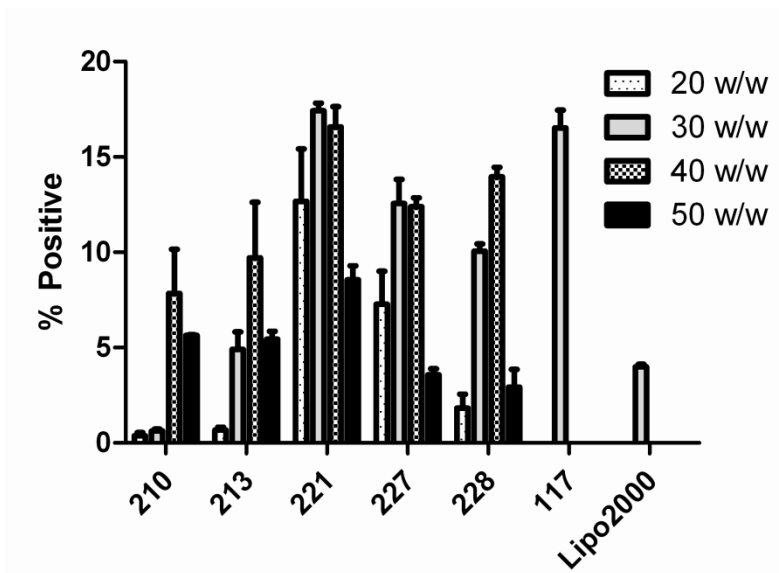

Figure S6b: Transfection of Human Mesenchymal Stem Cells using end-modified polymers and a double DNA dose. Percent positive cells determined by GFP expression and FACS. Mean + SD shown. Polymers are used at 20, 30, 40 and 50 w/w and Lipofectamine 2000 is used following manufacturer instructions.

**hMSC Cell Viability in serum  
(3ug DNA/well)**

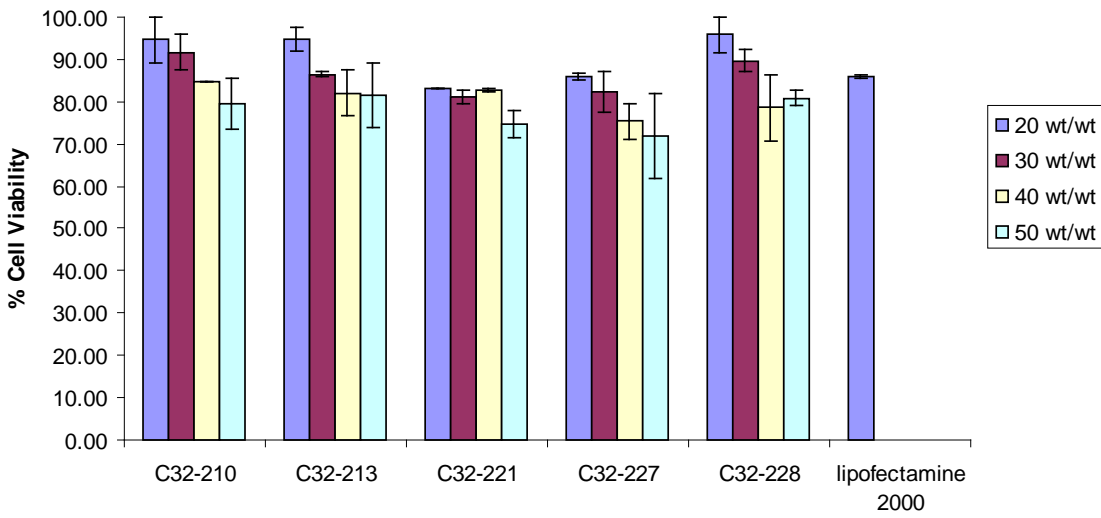

**hMSC Cell Viability in serum  
(6ug DNA/well)**

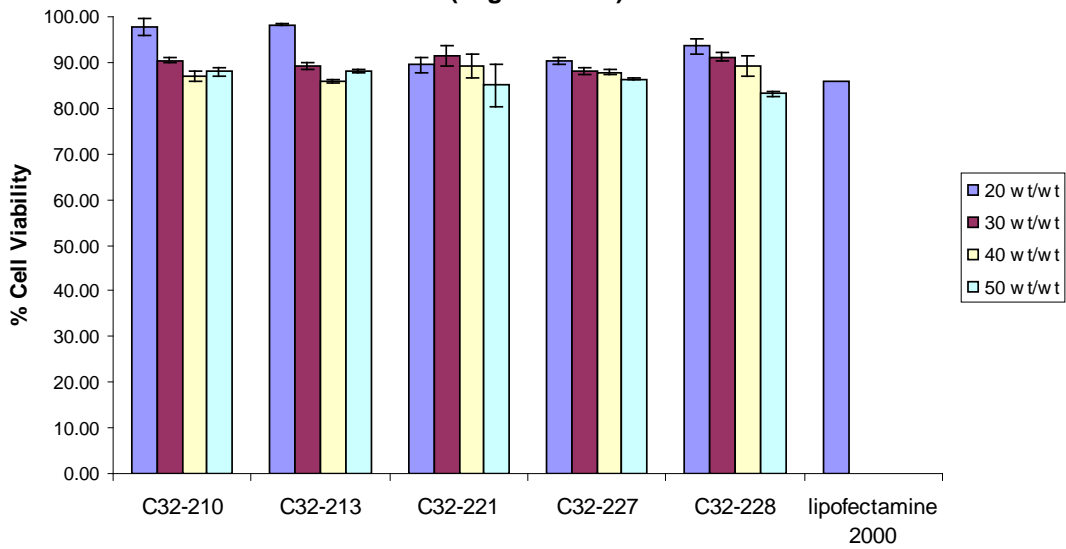

Figure S6c and S6d: Transfection of Human Mesenchymal Stem Cells using end-modified polymers and regular or double DNA doses. Percent viable cells as compared to untreated controls. Mean + SD shown. Polymers are used at 20, 30, 40 and 50 w/w and Lipofectamine 2000 is used following manufacturer instructions.



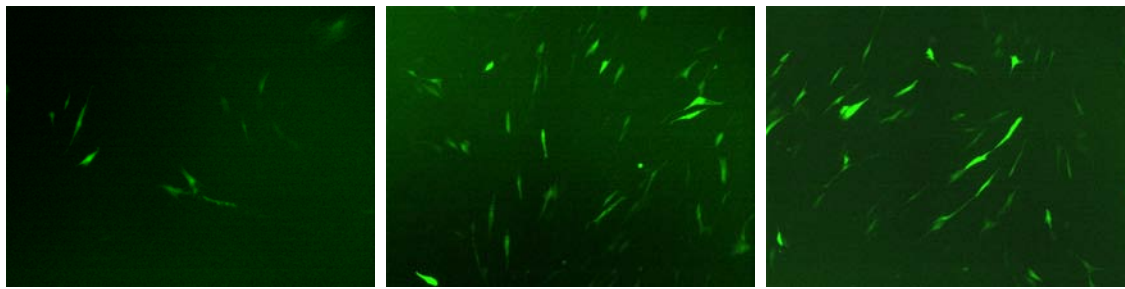

Lipo

3  $\mu$ g 40w/w C32-221

3  $\mu$ g 40w/w C32-227

Figure S6e: GFP Micrographs showing transfection of Human Mesenchymal Stem Cells using end-modified polymers.

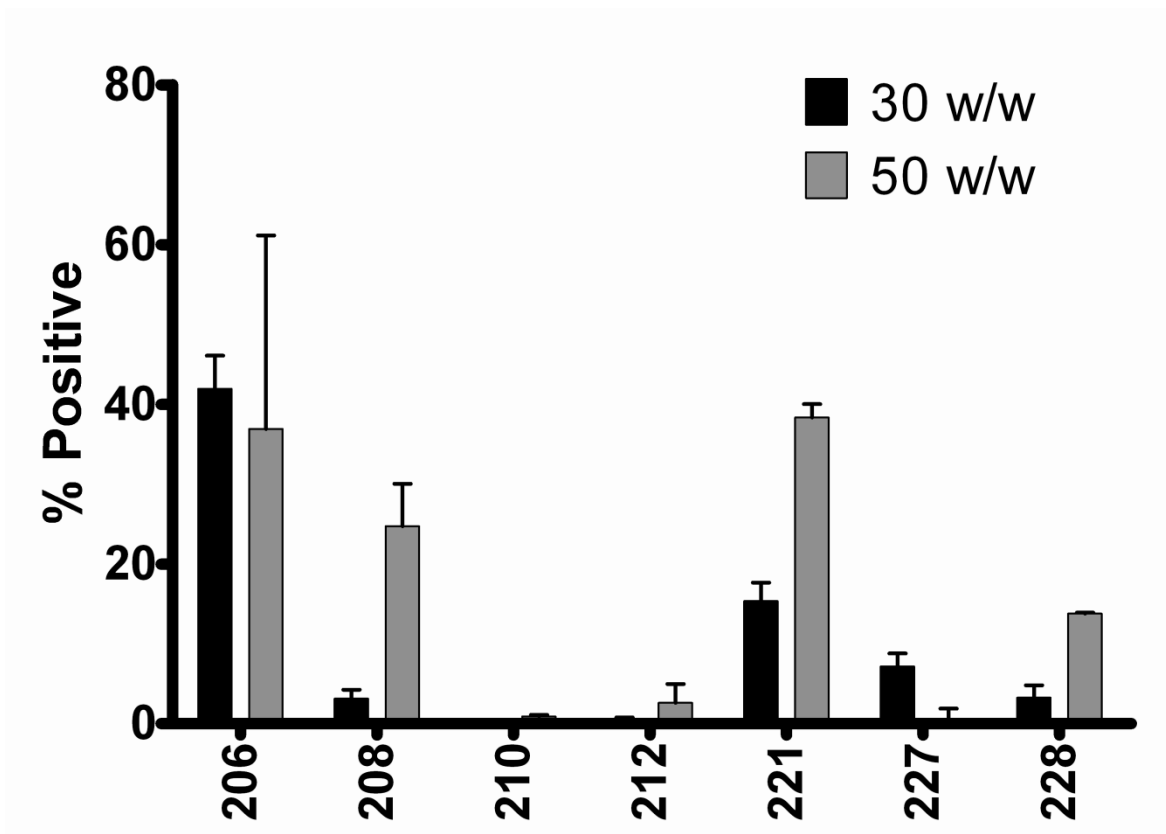

Figure S7a. Transfection of COS-7 cells using end-modified polymers in the presence of 100% serum. Percent positive cells determined by GFP expression and FACS. Mean + SD shown. Polymers are used at 30 w/w and 50 w/w and Lipofectamine 2000 is used following manufacturer instructions.

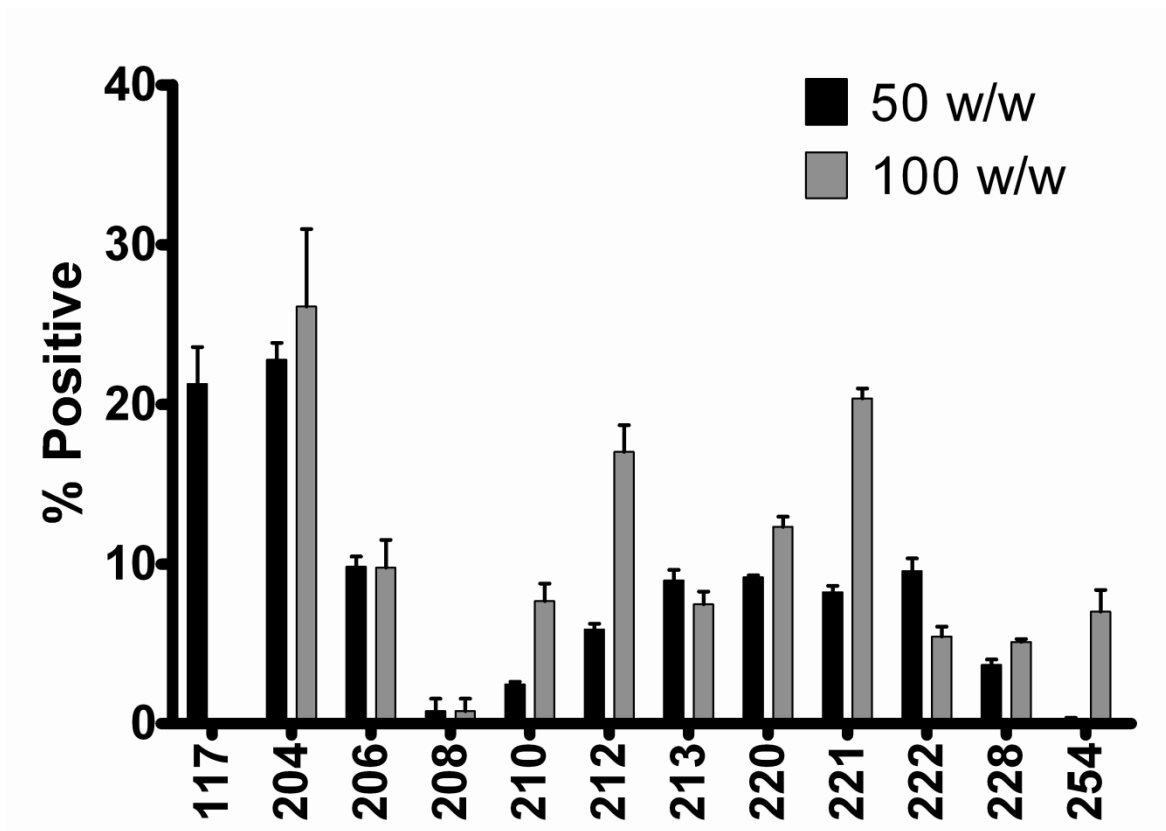

Figure S7b. Transfection of HUVECs using end-modified polymers in the presence of 100% serum. Percent positive cells determined by GFP expression and FACS. Mean + SD shown. Polymers are used at 50 w/w and 100 w/w and Lipofectamine 2000 is used following manufacturer instructions.

| <b>Polymer</b> | <b>Mn</b> | <b>Mw</b> | <b>PDI</b> |
|----------------|-----------|-----------|------------|
| 117            | 4500      | 8300      | 1.84       |
| 200            | 5200      | 9100      | 1.75       |
| 206            | 3400      | 8600      | 2.53       |
| 210            | 5200      | 12400     | 2.38       |
| 212            | 3500      | 7900      | 2.26       |
| 213            | 3100      | 8000      | 2.58       |
| 218            | 3100      | 7300      | 2.35       |
| 221            | 9100      | 19700     | 2.16       |
| 227            | 8100      | 16700     | 2.06       |
| 228            | 7700      | 15700     | 2.04       |
| 240            | 3900      | 8800      | 2.26       |
| 241            | 4400      | 10800     | 2.45       |
| 242            | 4900      | 12300     | 2.51       |
| 243            | 3900      | 8600      | 2.21       |
| 246            | 3400      | 7100      | 2.09       |
| 248            | 2800      | 6300      | 2.25       |
| 249            | 3400      | 8300      | 2.44       |
| 250            | 4700      | 9100      | 1.94       |
| 251            | 3500      | 8300      | 2.37       |
| 252            | 4300      | 8700      | 2.02       |
| 253            | 4200      | 8500      | 2.02       |
| 254            | 9300      | 14200     | 1.53       |
| 255            | 4300      | 8700      | 2.02       |
| 256            | 4200      | 8500      | 2.02       |
| 257            | 4300      | 8600      | 2.00       |
| 258            | 4000      | 8400      | 2.10       |
| 259            | 4900      | 8700      | 1.78       |

Figure S8: Gel permeation chromatography characterization of polymers

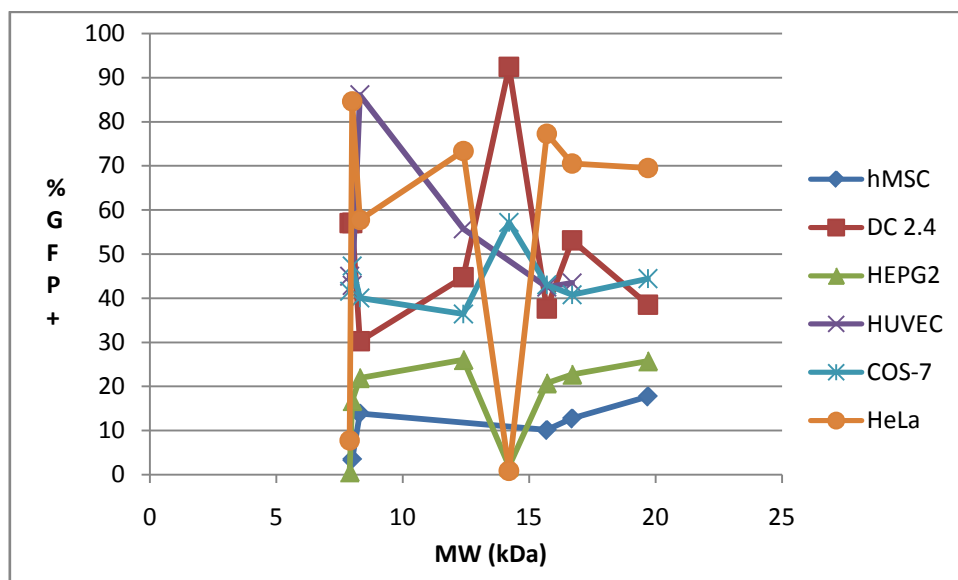

Figure S9: Molecular weight (MW) of end-modified polymers vs. transfection efficacy across all cell types. Molecular weight does not correlate to transfection efficacy. Polymers shown are the lead polymers from Figure 3.

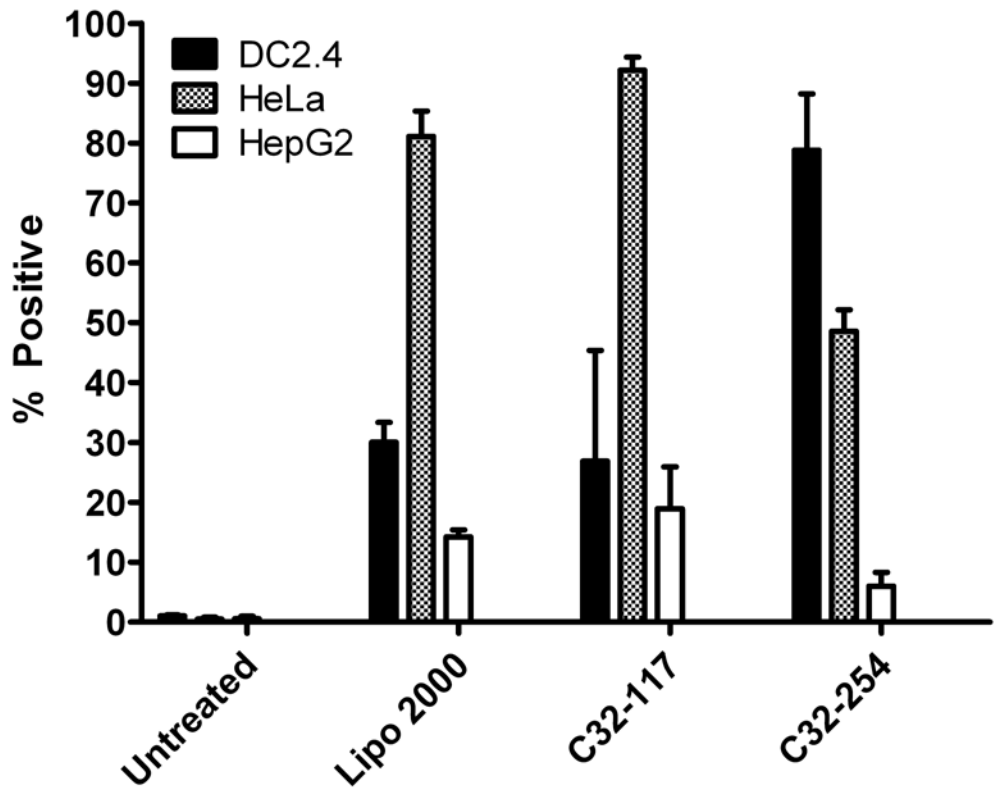

Figure S10: Transfection of multiple cell types side-by-side using end-modified polymers and a double DNA dose. Percent positive cells determined by GFP expression and FACS. Mean + SD shown. Polymers are used at 30 w/w and Lipofectamine 2000 is used following manufacturer instructions. There is no observable change in cytotoxicity at this higher DNA dose.
